# Supplementary material
Source: MDPI journal article supplement (https://www.mdpi.com/2076-3263/11/2/97)
Supplement: s1 [file s1]

Supplementary material

# Timing of Contractional Tectonics in the Miocene Foreland Basin System of the Umbria Pre-Apennines (Italy): An Updated Overview

Francesco Brozzetti <sup>1,2</sup>, Daniele Cirillo <sup>1,2,\*</sup> and Lucina Luchetti <sup>3</sup>

<sup>1</sup> Dipartimento di Scienze Psicologiche, della Salute e del Territorio, Università G. d'Annunzio, via dei Vestini 31, 66100 Chieti, Italy; francesco.brozzetti@unich.it

<sup>2</sup> Centro interUniversitario per l'analisi SismoTettonica tridimensionale (CRUST), Italy

<sup>3</sup> ARTA-Abruzzo, District of Chieti, Via D. Spezioli 52, 66100 Chieti, Italy; l.luchetti@artaabruzzo.it

\* Correspondence: d.cirillo@unich.it; Tel.: +39-0871-355-6389

This supplementary material consists of 6 figures

## Supplementary Figures

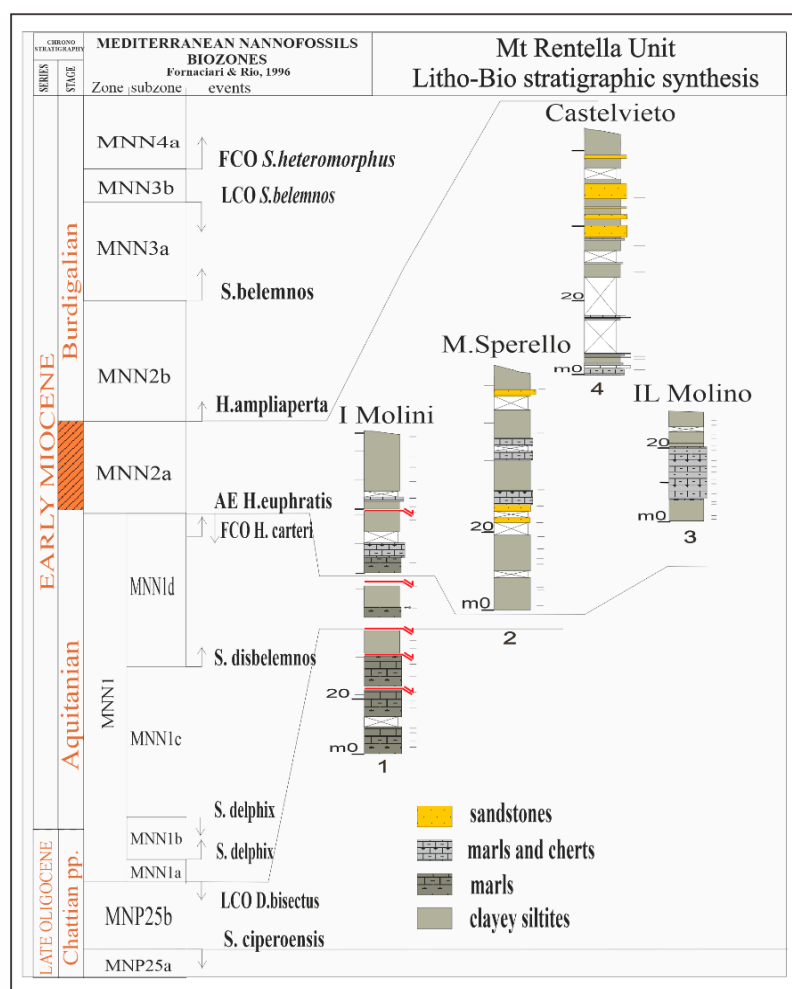

**Citation:** Brozzetti, F.; Cirillo, D.; Luchetti, L. Timing of Contractional Tectonics in the Miocene Foreland Basin System of the Umbria Pre-Apennines (Italy): An Updated Overview. *Geosciences* **2021**, *11*, 97. <https://doi.org/10.3390/geosciences11020097>

Academic Editors: Domenico Liotta, Giancarlo Molli, Angelo Cipriani and Jesus Martinez-Frias

Received: 5 January 2021

Accepted: 8 February 2021

Published: 19 February 2021

**Publisher's Note:** MDPI stays neutral with regard to jurisdictional claims in published maps and institutional affiliations.

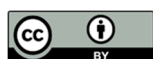

**Copyright:** © 2021 by the authors. Submitted for possible open access publication under the terms and conditions of the Creative Commons Attribution (CC BY) license (<http://creativecommons.org/licenses/by/4.0/>).

**Figure S1.** Stratigraphic correlation scheme of the REN sections studied by means of the recognized calcareous nannofossils bioevents.

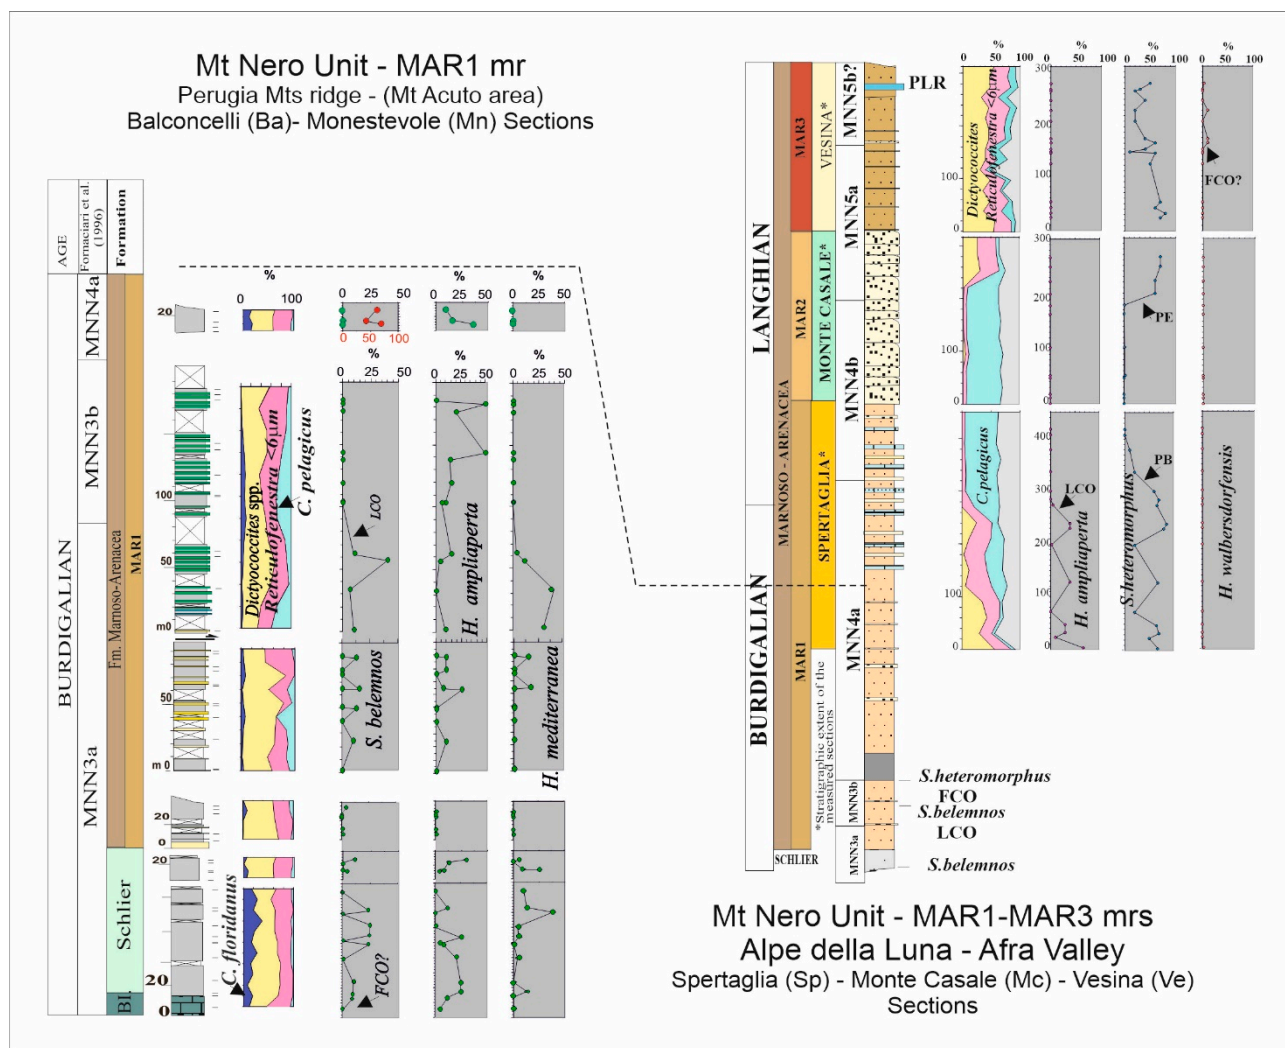

**Figure S2.** Stratigraphic correlation scheme of the reference sections of the Mt Nero Unit in the study area; left): composite log of the Mt Acuto succession in the Perugia Mts ridge (from integration of the sections Ba and Mn in the map of Fig. 1); right): composite log of the Alpe della Luna succession in the Spertaglia, Monte Casale and Vesina sections (respectively Sp, Mc and Ve in Fig. 1). The distributions of the nannofossils marker species, resulting from the quantitative biostratigraphic analyses, are plotted in the diagrams drawn alongside the stratigraphic columns.

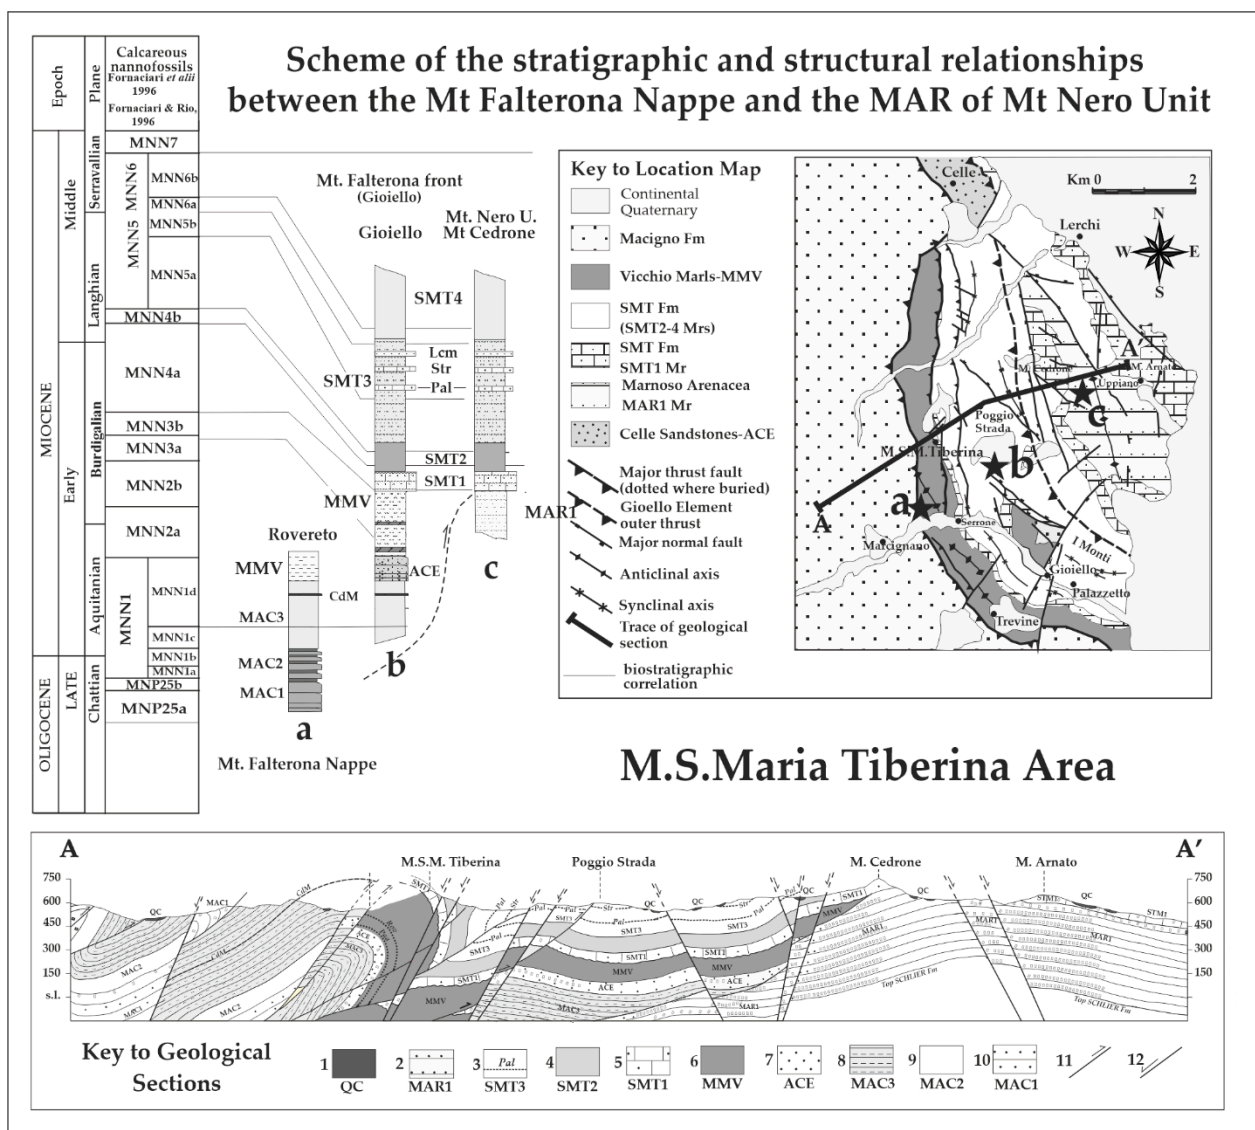

**Figure S3.** Summary of the main stratigraphic and structural features of the Monte Santa Maria Tiberina (MSMT) area.

Top-left: litho-bio-stratigraphy of the outer Falterona Nappe (section Rovereto-a and Gioiello-b) and Mt Nero Unit (sections c- Mt Cedrone and San Lorenzo, Sl in Fig. 1).

Top-right: structural sketch of the MSMT area with the trace of the section reported below; stars indicate the sectors characterized by the synthetic stratigraphy in the left.

Bottom: Interpretative geological cross-section of the MSMT area (lithological patterns are the same as in the sketch above).

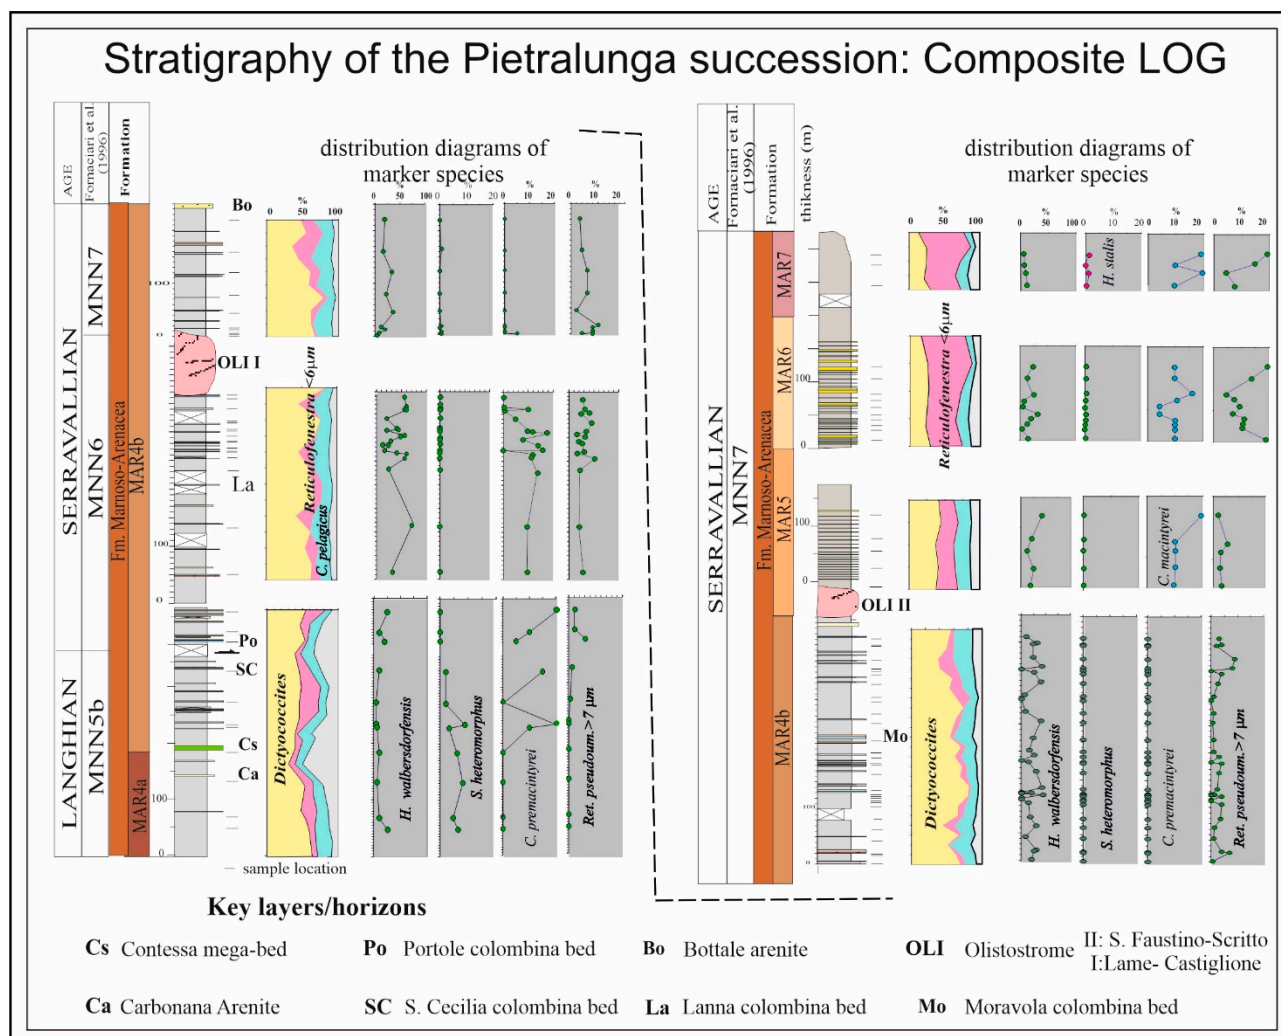

**Figure S4.** Composite Log of the MAR formation in the Pietralunga Unit resulting from the correlation of the 8 sections located in Fig. 1 (Vm, Sc, Po, Ss, Pi, Mo, Pz and Mf; full names in the main text); the position of the key-beds used for the lithostratigraphic correlation is shown by the acronyms explained below. The distributions of the nannofossils marker species, resulting from the quantitative biostratigraphic analyses, are plotted in the diagrams drawn alongside the stratigraphic columns.

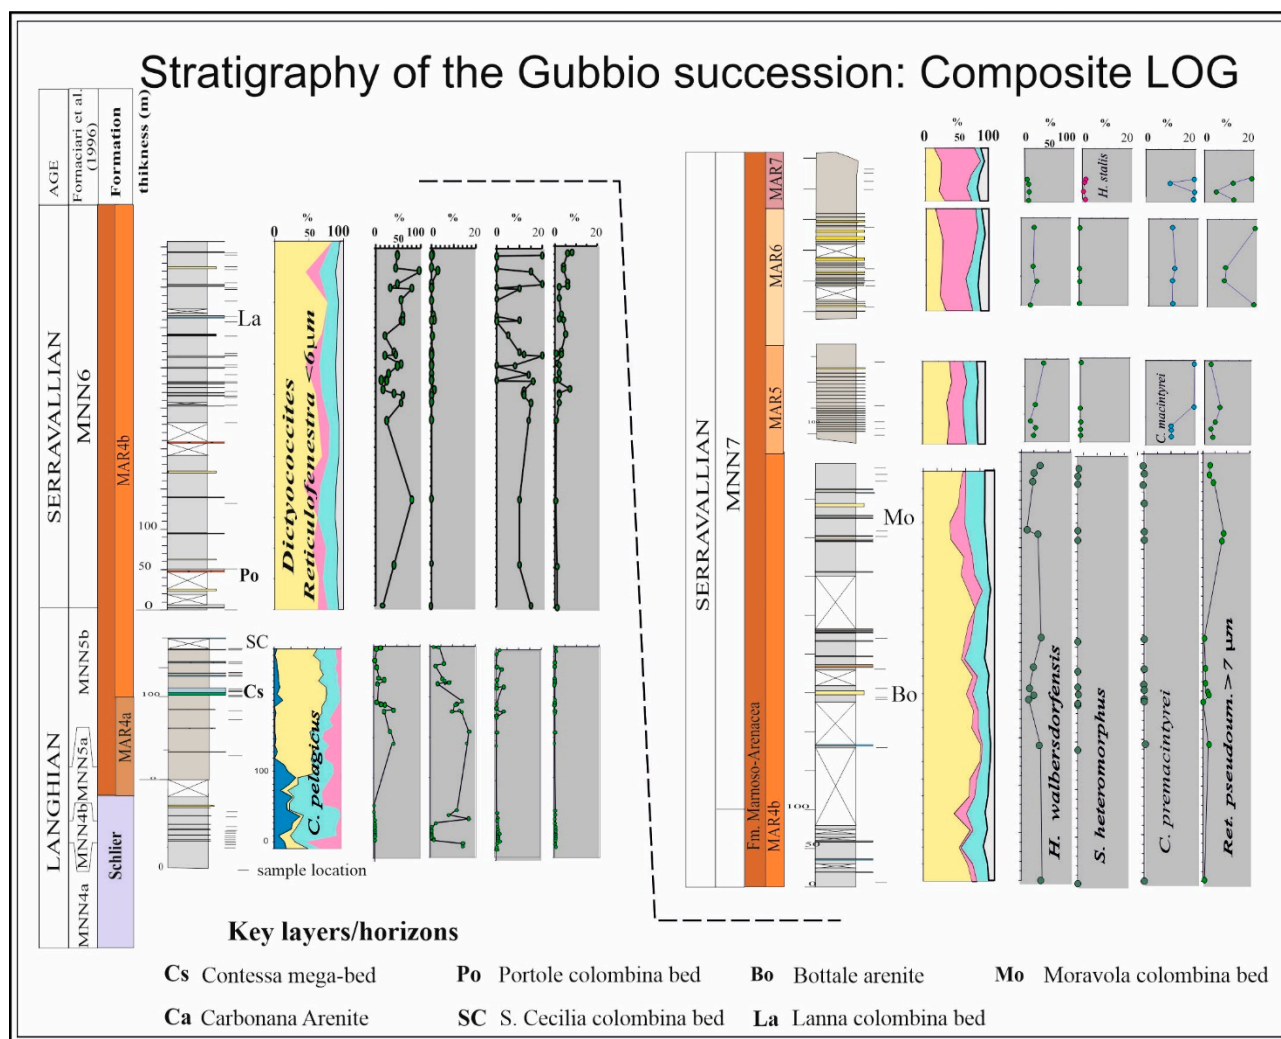

**Figure S5.** Composite Log of the MAR formation in the Gubbio Unit resulting from the correlation of the the sections Contessa and Bevelle (Cs and Be respectively in Fig. 1); the position of the key-beds used for the lithostratigraphic correlation is shown by the acronyms explained below. The distributions of the nannofossils marker species, resulting from the quantitative biostratigraphic analyses, are plotted in the diagrams drawn alongside the stratigraphic columns.
